# Supplementary material
Source: publisher figshare collection journal article supplement (https://sage.figshare.com/ndownloader/files/24026777)
Supplement: Supplementary file 1 [file 24026777]

*Alexy, E., Burgess, A. W., & Prentky, R. A. (2009). Pornography use as a risk marker for an aggressive pattern of behaviour among sexually reactive children and adolescents. Journal of the American Psychiatric Nurses Association, 14(6), 442–453.

*Baron, R. A. (1974). The aggression-inhibiting influence of heightened sexual arousal. Journal of Personality and Social Psychology, 30(3), 318–322.

*Baron, R. A. (1979). Heightened sexual arousal and physical aggression: An extension to females. Journal of Research in Personality, 13, 91–102.

*Boeringer, S. B. (1994). Pornography and sexual aggression: Associations of violent and nonviolent depictions with rape and rape proclivity. Deviant Behavior: An Interdisciplinary Journal, 15, 289–304.

*Bonino, S., Ciairano, S., Rabaglietti, E., & Cattelino, E. (2006). Use of pornography and self-reported engagement in sexual violence among adolescents. European Journal of Developmental Psychology, 3(3), 265–288.

*Brown, A. P. (2015). The relationship among male pornography use, attachment, and aggression in romantic relationships. All Theses and Dissertations. 4397. <https://scholarsarchive.byu.edu/etd/4397>

*Brown, J. D., & L’Engel, K. (2009). X-rated: Sexual attitudes and behaviors associated with U.S. early adolescents’ exposure to sexually explicit media. Communication Research, 36(1), 129–151.

*Burton, D. L., Leibowitz, G. S., & Howard, A. (2010). Comparison by crime type of juvenile delinquents on pornography exposure: The absence of relationships between exposure to pornography and sexual offense characteristics. Journal of Forensic Nursing, 6, 121–129.

*Cantor, J., Zillman, D., & Einsiedel, E. F. (1978). Female responses to provocation after exposure to aggressive and erotic films. Communication Research, 5(4), 395–411.

*Carr, J. L., & VanDeusen, K. M. (1994). Risk factors for male sexual aggression on college campuses. Journal of Family Violence, 19(5), 279–289.

*Chang, F., Chiu, C., Miao, N., Chen, P., Lee, C., & Chiang, J. (2016). Predictors of unwanted exposure to online pornography and online sexual solicitation of youth. Journal of Health Psychology, 21(6), 1107–1118.

*Condron, M. K., & Nutter, D. E. (1988). A preliminary examination of the pornography experience of sex offenders, paraphiliacs, sexual dysfunction patients, and controls based on Meese Commission recommendations. Journal of Sex & Marital Therapy, 14(4), 285–298.

*D’Abreu, L., & Krahe, B. (2013). Predicting sexual aggression in male college students in Brazil. Psychology of Men & Masculinity, 15(5), 152–162.

*Dawson, K., Tafro, A., & Štulhofer, A. (2019). Adolescent sexual aggressiveness and pornography use: A longitudinal assessment. Aggressive Behavior. <https://doi-org.stetson.idm.oclc.org/10.1002/ab.21854>

*Demare, D., Lips, H. M., & Briere, J. (1993). Sexually violent pornography, anti-women attitudes, and sexual aggression: A structural equation model. Journal of Research in Personality, 27, 285–300.

*Diamond, M., Jozifkova, E., & Weiss, P. (2011). Pornography and sex crimes in the Czech Republic. Archives of Sex Behavior, 40, 1037–1043.

*Donnerstein, E. (1980). Aggressive erotica and violence against women. Journal of Personality and Social Psychology, 39(2), 269–277.

*Donnerstein, E., & Hallam, J. (1978). Facilitating effects of erotica on aggression against women. Journal of Personality and Social Psychology, 36(11), 1270–1277.

*Donnerstein, E., & Berkowitz, L. (1981). Victim reactions in aggressive erotic films as a factor in violence against women. Journal of Personality and Social Psychology, 41(4), 710–724.

*Donnestein, E., & Barrett, G. (1978). Effects of erotic stimuli on male aggression toward females. Journal of Personality and Social Psychology, 36(2), 180–188.

*Endrass, J., Urbaniok, F., Hammermeister, L. C., Benz, C., Elbert, T., Laubacher, A., & Rossegger, A. (2009). The consumption of internet child pornography and violent and sex offending. BMC Psychiatry, 9(43), 1–7.

*Ferguson, C. J., & Hartley, R. D. (2009). The pleasure is momentary . . . the expense damnable? The influence of pornography on rape and sexual assault. Aggression and Violent Behavior, 14(5), 323–329.

*Gentry, C. S. (1991). Pornography and rape: An empirical analysis. Deviant Behavior: An Interdisciplinary Journal, 12, 277–288.

*Goldstein, M. J. (1973). Exposure to erotic stimuli and sexual deviance. Journal of Social Issues, 29(3), 197–219.

*Gorman, S. (2013). Porn sex vs. real sex: Exploring pornography’s impact on sexual behaviors, attitudes, and relationships [Dissertation]. Georgia State University. https://scholarworks.gsu.edu/scoiology_diss/76

*Hagen, T., Thompson, M. P., & Williams, J. (2018). Religiosity reduces sexual aggression and coercion in a longitudinal cohort of college men: Mediating roles of peer norms, promiscuity, and pornography. Journal for the Scientific Study of Religion, 57(1), 95–108.

*Hardit, S. (2012). Predicting sexual aggression among college men: The role of male peer groups and sexualized media [Dissertation]. University of Illinois at Urbana–Champaign.

*Kennair, L. E. O., & Bendixen, M. (2012). Sociosexuality as predictor of sexual harassment and coercion in female and male high school students. Evolution and Human Behavior, 33, 479–490.

*Kernsmith, P. D., & Kernsmith, R. M. (2009). Female pornography use and sexual coercion perpetration. Deviant Behavior, 30, 589–610.

*Kimmel, M. S., & Linders, A. (1996). Does censorship make a difference? An aggregate empirical analysis of pornography and rape. Journal of Psychology & Human Sexuality, 8(3), 1–20.

*Kjellgren, C., Priebe, G., Svedin, C. G., Mossige, S., & Langstrom, N. (2009). Female youth who sexually coerce: Prevalence, risk, and protective factors in two national high school surveys. Journal of Sexual Medicine, 8, 3354–3362.

*Langevin, R., Lang, R. A., Wright, P., Handy, L., Frenzel, R. R., & Black, E. L. (1988). Pornography and sexual offenses. Annals of Sex Research, 1, 335–362.

*Leonard, K. E., & Taylor, S. P. (1983). Exposure to pornography, permissive and nonpermissive cues, and male aggression toward females. Motivation and Emotion, 7(3), 291–299.

*Malamuth, N. M., Addison, T., & Koss, M. (2000). Pornography and sexual aggression: Are there reliable effects and can we understand them? Annual Review of Sex Research, 11, 26–91.

*Malamuth, N. M., & Ceniti, J. (1986). Repeated exposure to violent and nonviolent pornography: Likelihood of raping ratings and laboratory aggression against women. Aggressive Behavior, 12, 129–137.

*Marshall, W. L. (1988). The use of sexually explicit stimuli by rapists, child molesters, and nonoffenders. The Journal of Sex research, 25(2), 267–288.

*Meyer, T. P. (1971). The effects of sexually arousing and violent films on aggressive behaviour. The Journal of Sex Research, 8(4), 324–331.

*Peeks, A. S. (2006). The sexual experiences of heterosexual college males: Examining components of sexual aggression [Dissertation]. University of Nebraska.

*Ramirez, J., Bryant, J, & Zillman, D. (1982). Effects of erotica on retaliatory behaviour as a function of level of prior provocation. Journal of Personality and Social Psychology, 43(5), 971–978.

*Richardson, C. (2018). “I imagine the male isn’t in the video and it is me:” A mixed methods study of internet pornography, masculinity, and sexual aggression in emerging adulthood [Public Access Theses and Dissertations]. College of Education and Human Sciences, 328.

*Rostad, W. L., Gittins-Stone, D., Huntington, C., Rizzo, C. J., Pearlman, D., & Orchowski, L. (2019). The association between explosure to violent pornography and teen dating violence in grade 10 high school students. Archives of Sexual Behavior, 48, 2137–2147.

*Sapolsky, B. S., & Zillman, D. (1981). The effect of soft-core and hard-core erotica on provoked and unprovoked hostile behavior. The Journal of Sex Research, 17(4), 319–343.

*Scott, J. E., & Schwalm, L. A. (1988). Rape rates and the circulation rates of adult magazines. The Journal of Sex research, 24, 241–250.

*Seto, M.C., Kjellgren, C., Priebe, G., Mossige, S., Svedin, C. G., & Langstrom, N. (2010). Sexual coercion experience and sexually coercive behaviour: A population study of Swedish and Norwegian male youth. Child Maltreatment, 15(3), 219–228.

*Simons, L. G., Simons, R. L., Lei, M., & Sutton, T. E. (2012). Exposure to harsh parenting and pornography as explanations for males’ sexual coercion and females’ sexual victimization. Violence and Victims, 27(3), 378–395.

*Smith, M. D., & Hand, C. (1987). The pornography/aggression linkage: Results from a field study. Deviant Behavior, 8, 389–399.

*Tascher, D. K. (1984). The effects of sex role stereotypes and sexually-aggressive film content on aggression against women [Dissertation]. Hofstra university.

*Thompson, M. P., Koss, M. P., Kingree, J. B., Goree, J., & Rice, J. (2011). A Prospective mediation model of sexual aggression among college men. Journal of Interpersonal Violence, 26(1), 2716–2734.

*Tomaszewska, P., & Krahe, B. (2018). Predictors of sexual aggression victimization and perpetration among Polish university students: A longitudinal study. Archives of Sexual Behaviour, 47, 493–505.

*Vega, V., & Malamuth, N. M. (2007). Predicting sexual aggression: The role of pornography in the context of general and specific risk factors. Aggressive Behavior, 33, 104–117.

*White, L. A. (1979). Erotica and aggression: The influence of sexual arousal, positive affect, and negative affect on aggressive behaviour. Journal of Personality and Social Psychology, 37(4), 591–601.

*Winnick, C., & Evans, J. T. (1996). The Relationship between nonenforcement of state pornography laws and rates of sex crime arrests. Archives of Sexual Behavior, 25(5), 439–453.

*Yang, D., & Youn, G. (2012). Effects of exposure to pornography on male aggressive behavioural tendencies. The Open Psychology Journal, 5, 1–10.

*Ybarra, M. L., Mitchell, K. J., Hamburger, M., Diener-West, M., & Leaf, P. J. (2011). X-Rated material and perpetration of sexually aggressive behavior among children and adolescents: Is there a link? Aggressive Behavior, 37, 1–18.

*Zillman, D., Bryant, J., & Carveth, R. A. (1981). The effects of erotica featuring sadomasochism and bestiality on motivated intermale aggression. Personality and Social Psychology Bulletin, 7(1), 153–159.

*Zillman, D., Bryant, J., Comisky, P. W., & Medoff, N. J. (1981). Excitation and hedonic valence in the effect of erotica on motivated intermale aggression. European Journal of Social Psychology, 11, 233–252.

*Zillman, D., Hoyt, J. L., & Day, K. D. (1974). Strength and duration of the effect of aggressive, violent, and erotic communications on subsequent aggressive behavior. Communication Research, 1(3), 286–306. https://doi.org/stetson.idm.oclc.org/10.1177/009365027400100303

*Zillman, D., & Sapolsky, B. S. (1977). What mediates the effect of mild erotica on annoyance and hostile behaviour in males? Journal of Personality and Social Psychology, 35(8), 587–596.
